# Supplementary material for: Trends of incidence and prognosis of gastric neuroendocrine neoplasms: a study based on SEER and our multicenter research
Source: Springer Nature journal article supplement (doi:10.1007/s10120-020-01046-8), 2020-02-05
Supplement: MOESM2 [file 17636602]

**Article title:**

Trends of incidence and prognosis of gastric neuroendocrine neoplasms-a study based on SEER and our multicenter research

**Journal name:** Gastric cancer

**Author names and affiliations:**

Ping Hu<sup>1</sup>, Jian'an Bai<sup>1</sup>, Min Liu<sup>1</sup>, Jingwen Xue<sup>1</sup>, Tiaotiao Chen<sup>1</sup>, Rui Li<sup>2</sup>, Xiaoling Kuai<sup>3</sup>, Haijian Zhao<sup>4</sup>, Xiaolin Li<sup>1</sup>, Ye Tian<sup>1</sup>, Wei Sun<sup>5</sup>, Yujia Xiong<sup>2</sup>, Qiyun Tang<sup>1</sup>

1The First Affiliated Hospital of Nanjing Medical University

2Rui Li: The First Affiliated Hospital of Suzhou University

3Xiaoling Kuai: Affiliated Hospital of Nantong University

4Haijian Zhao: The Second People's Hospital of Huai'an

5Wei Sun: Huai'an First People's Hospital

2Yujia Xiong: The First Affiliated Hospital of Suzhou University

**E-mail address of the corresponding author:** tqy831@163.com

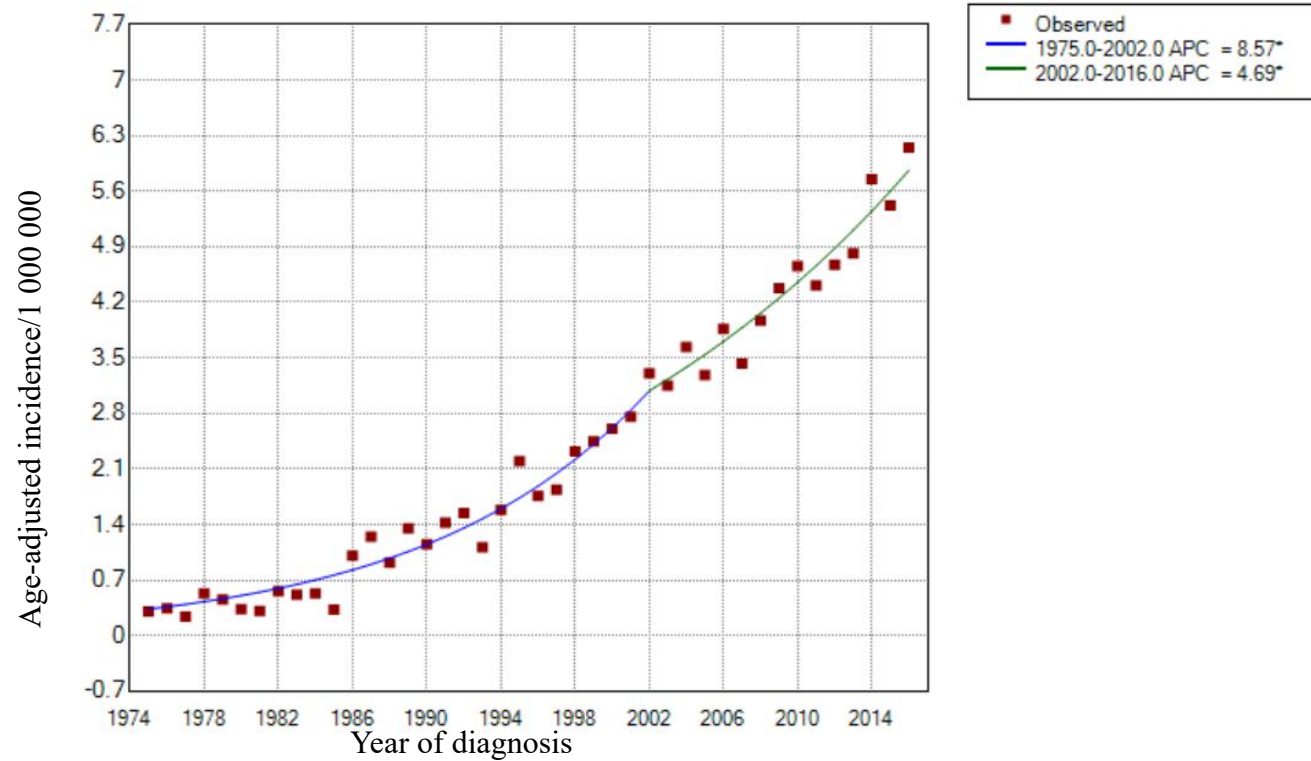

\*Indicates that the Annual Percent Change(APC) is significantly different from zero at the  $\alpha=0.05$  level.

Final Selected Model: 1 Jionpoint

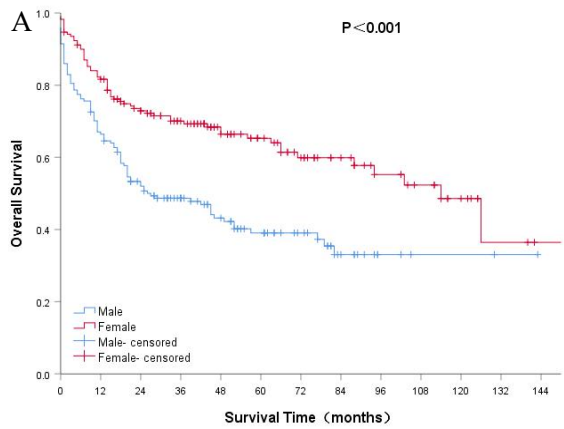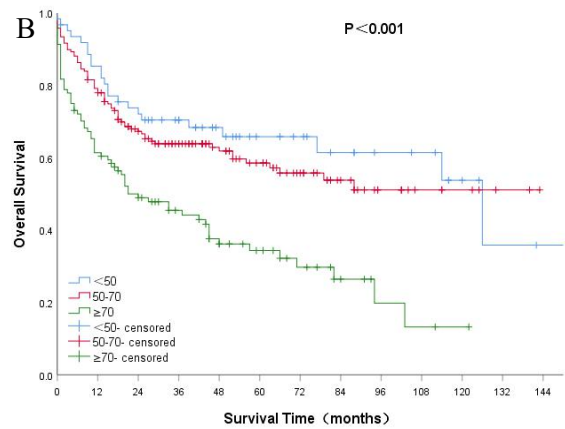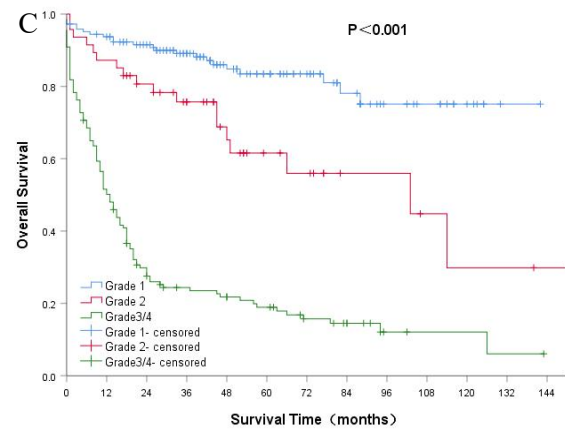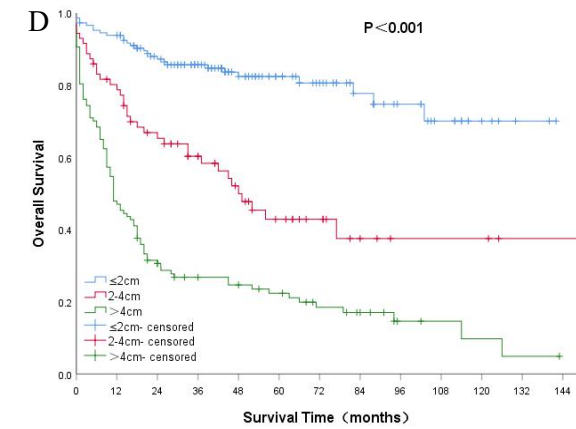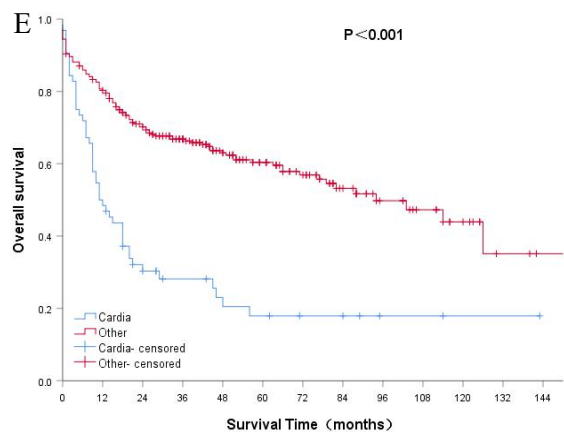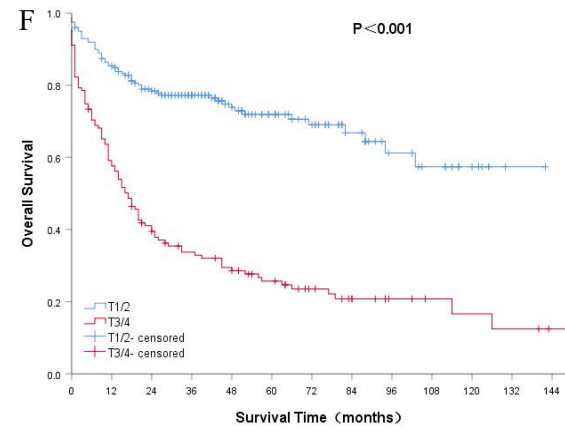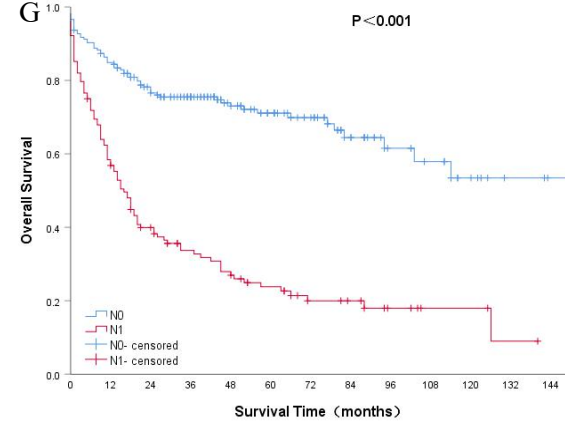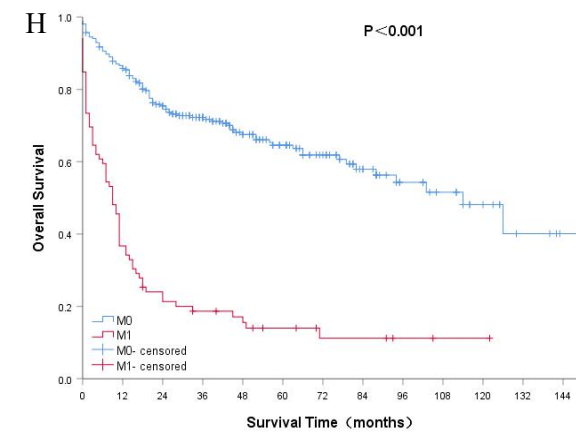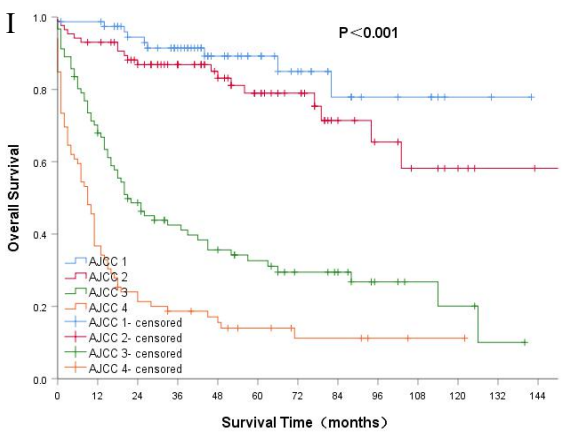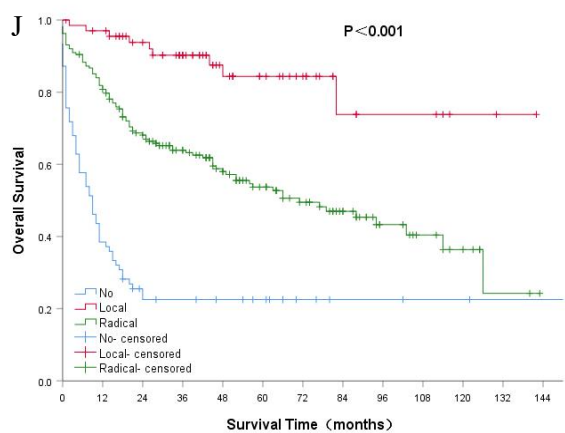

**Supplementary Figure 2**

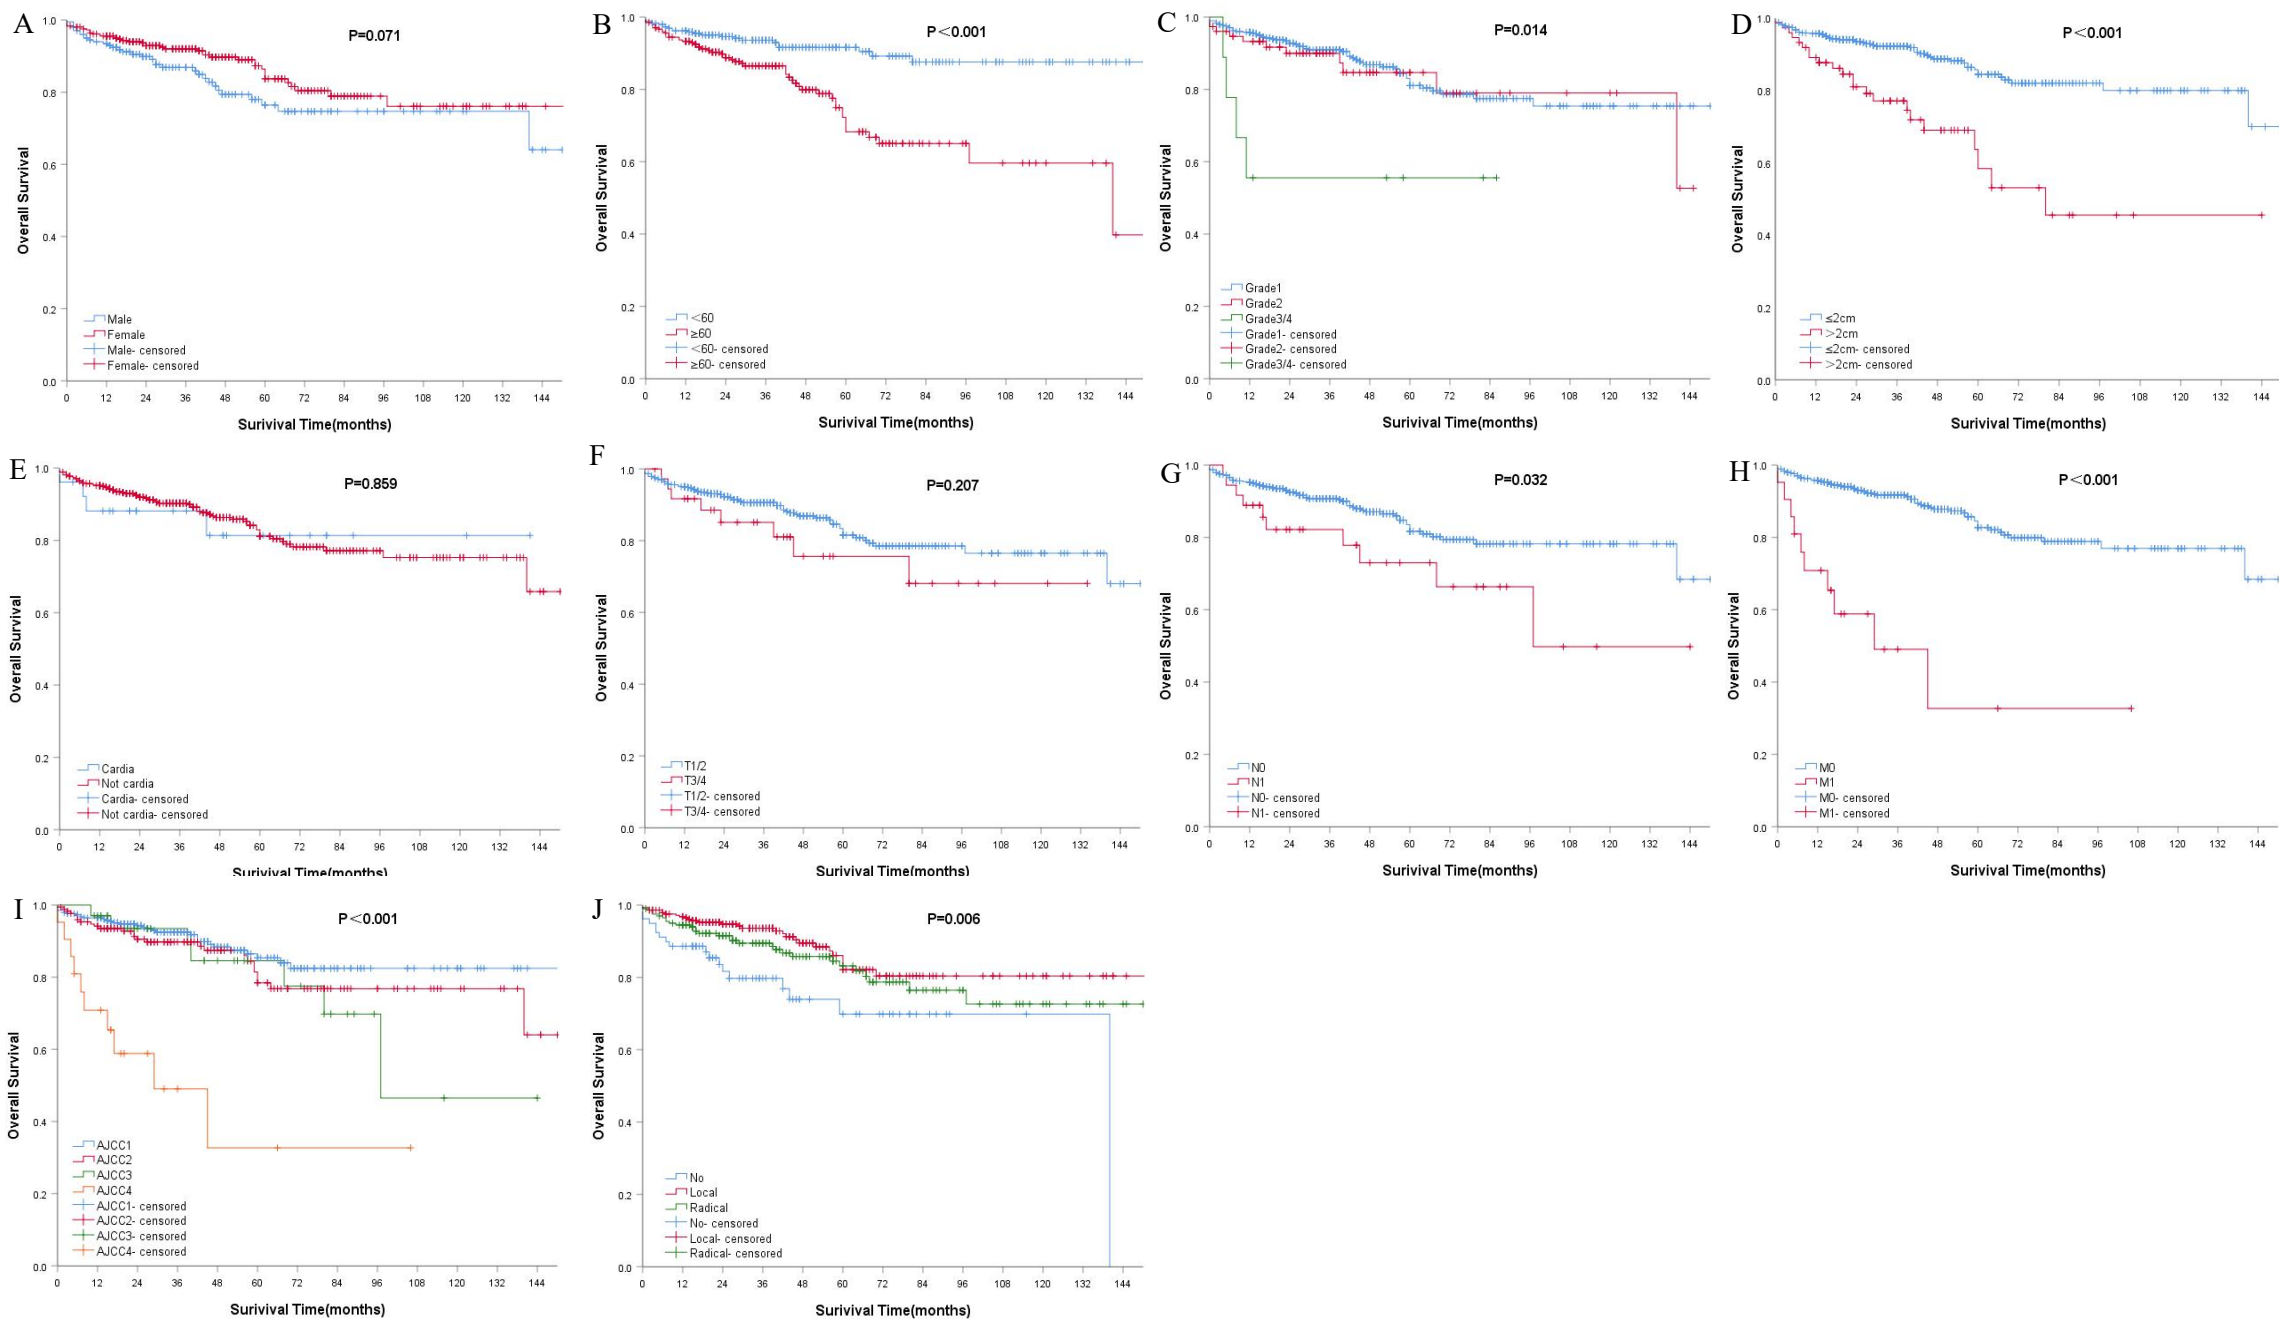

**Supplementary Figure 3**
