# Supplementary material for: Trends of incidence and prognosis of gastric neuroendocrine neoplasms: a study based on SEER and our multicenter research
Source: Springer Nature journal article supplement (doi:10.1007/s10120-020-01046-8), 2020-02-05
Supplement: MOESM3 [file 17636602]

**Article title:** Trends of incidence and prognosis of gastric neuroendocrine neoplasms-a study based on SEER and our multicenter research

**Journal name:** Gastric cancer

**Author names and affiliations:**

Ping Hu<sup>1</sup>, Jian'an Bai<sup>1</sup>, Min Liu<sup>1</sup>, Jingwen Xue<sup>1</sup>, Tiaotiao Chen<sup>1</sup>, Rui Li<sup>2</sup>, Xiaoling Kuai<sup>3</sup>, Haijian Zhao<sup>4</sup>, Xiaolin Li<sup>1</sup>, Ye Tian<sup>1</sup>, Wei Sun<sup>5</sup>, Yujia Xiong<sup>2</sup>, Qiyun Tang<sup>1</sup>

<sup>1</sup>The First Affiliated Hospital of Nanjing Medical University

<sup>2</sup>Rui Li: The First Affiliated Hospital of Suzhou University

<sup>3</sup>Xiaoling Kuai: Affiliated Hospital of Nantong University

<sup>4</sup>Haijian Zhao: The Second People's Hospital of Huai'an

<sup>5</sup>Wei Sun: Huai'an First People's Hospital

<sup>2</sup>Yujia Xiong: The First Affiliated Hospital of Suzhou University

**E-mail address of the corresponding author:** tqy831@163.com

**Supplementary Table : Demographic or clinical characteristics of patients with  
GNENs in both training and validation sets**

|                              | GNEC           |                |                |                | GNET           |                |                |                |
|------------------------------|----------------|----------------|----------------|----------------|----------------|----------------|----------------|----------------|
|                              | Training Set   |                | Validation Set |                | Training Set   |                | Validation Set |                |
|                              | <u>(n=334)</u> |                | <u>(n=139)</u> |                | <u>(n=566)</u> |                | <u>(n=107)</u> |                |
|                              | Cases          | Proportion (%) | Cases          | Proportion (%) | Cases          | Proportion (%) | Cases          | Proportion (%) |
| <b>Median Follow up time</b> |                | 30.5(0-153)    |                | 27.0(2-89)     |                | 36.0(1-152)    |                | 40.0(6-107)    |
| <b>Median OS</b>             |                | 71             |                | 41             |                | >150           |                | >107           |
| <b>Gender</b>                |                |                |                |                |                |                |                |                |
| Male                         | 164            | 49.10          | 117            | 84.17          | 202            | 35.69          | 49             | 45.79          |
| Female                       | 170            | 50.90          | 22             | 15.83          | 364            | 64.31          | 58             | 54.21          |
| <b>Age</b>                   |                |                |                |                |                |                |                |                |
| Median                       |                | 63(21-89)      |                | 66(42-82)      |                | 59(17-85)      |                | 55(17-89)      |
| Mean                         |                | 61.93±13.52    |                | 65.17±8.95     |                | 59.97±12.78    |                | 55.57±1.33     |
| <50                          | 62             | 18.56          | 8              | 5.76           | 294*           | 51.94*         | 65*            | 60.75*         |
| 50-69                        | 168            | 50.30          | 83             | 59.71          |                |                |                |                |
| ≥70                          | 104            | 31.14          | 48             | 34.53          | 272^           | 48.06^         | 42^            | 39.25^         |
| <b>Race</b>                  |                |                |                |                |                |                |                |                |
| Black                        | 43             | 12.87          | 0              | 0              | 80             | 14.13          | 0              | 0              |
| White                        | 260            | 77.84          | 0              | 0              | 460            | 81.27          | 0              | 0              |
| Other                        | 31             | 9.28           | 139            | 100.00         | 26             | 4.59           | 107            | 100            |

**Site**

|            |     |       |    |       |     |       |    |       |
|------------|-----|-------|----|-------|-----|-------|----|-------|
| Cardia     | 64  | 19.16 | 68 | 48.92 | 26  | 4.59  | 15 | 14.02 |
| Not Cardia | 270 | 80.84 | 71 | 51.08 | 540 | 95.41 | 92 | 85.98 |

**Size**

|       |     |       |    |       |                 |                    |                 |                    |
|-------|-----|-------|----|-------|-----------------|--------------------|-----------------|--------------------|
| ≤2cm  | 146 | 43.71 | 10 | 7.19  | 492             | 86.93              | 85              | 79.44              |
| 2-4cm | 71  | 21.26 | 82 | 58.99 |                 |                    |                 |                    |
| >4cm  | 117 | 35.03 | 47 | 33.81 | 74 <sup>#</sup> | 13.07 <sup>#</sup> | 22 <sup>#</sup> | 20.56 <sup>#</sup> |

**Grade**

|      |     |       |     |        |     |       |    |       |
|------|-----|-------|-----|--------|-----|-------|----|-------|
| G1   | 144 | 43.11 | 0   | 0      | 481 | 84.98 | 71 | 66.36 |
| G2   | 47  | 14.07 | 0   | 0      | 76  | 13.43 | 26 | 24.30 |
| G3/4 | 143 | 42.81 | 139 | 100.00 | 9   | 1.59  | 10 | 9.35  |

**T staging**

|      |     |       |     |       |     |       |    |       |
|------|-----|-------|-----|-------|-----|-------|----|-------|
| T1/2 | 199 | 59.58 | 24  | 17.27 | 529 | 93.46 | 95 | 88.79 |
| T3/4 | 135 | 40.42 | 115 | 82.73 | 37  | 6.54  | 12 | 11.21 |

**N staging**

|    |     |       |    |       |     |       |    |       |
|----|-----|-------|----|-------|-----|-------|----|-------|
| N0 | 206 | 61.68 | 40 | 28.78 | 530 | 93.64 | 95 | 88.79 |
| N1 | 128 | 38.32 | 99 | 71.22 | 36  | 6.36  | 12 | 11.21 |

**M staging**

|    |     |       |    |       |     |       |    |       |
|----|-----|-------|----|-------|-----|-------|----|-------|
| M0 | 255 | 76.35 | 92 | 66.19 | 545 | 96.29 | 99 | 92.52 |
| M1 | 79  | 23.65 | 47 | 33.81 | 21  | 3.71  | 8  | 7.48  |

**AJCC staging**

|   |    |       |   |      |     |       |    |       |
|---|----|-------|---|------|-----|-------|----|-------|
| I | 78 | 23.35 | 4 | 2.88 | 337 | 59.54 | 58 | 54.21 |
|---|----|-------|---|------|-----|-------|----|-------|

|     |    |       |    |       |     |       |    |       |
|-----|----|-------|----|-------|-----|-------|----|-------|
| II  | 86 | 25.75 | 20 | 14.39 | 174 | 30.74 | 33 | 30.84 |
| III | 91 | 27.25 | 68 | 48.92 | 34  | 6.01  | 8  | 7.48  |
| IV  | 79 | 23.65 | 47 | 33.81 | 21  | 3.71  | 8  | 7.48  |

**Surgery**

|            |     |       |     |       |     |       |    |       |
|------------|-----|-------|-----|-------|-----|-------|----|-------|
| No surgery | 78  | 23.35 | 6   | 4.32  | 79  | 13.96 | 5  | 4.67  |
| Local      | 68  | 20.36 | 0   | 0     | 287 | 50.71 | 62 | 57.94 |
| Radical    | 188 | 56.29 | 133 | 95.68 | 200 | 35.33 | 40 | 37.38 |

---

**Notes:** Considering different biological characteristics of GNEC and GNET, there were a little differences about grouping to minimize bias: \*<60 years old; <sup>^</sup>≥60 years old; #>2cm

**Abbreviation:** GNENs: gastric neuroendocrine neoplasms; GNEC: gastric neuroendocrine carcinoma; GNET: gastric neuroendocrine tumor; OS: overall survival
